# Supplementary material for: Uniform Expression and Relatively Small Position Effects Characterize Sister Transformants in Maize and Soybean
Source: PubMed Central journal article supplement (PMC6821721; doi:10.3389/fpls.2019.01209), 2019-10-24
Supplement: DataSheet_1.pdf [file DataSheet_1.pdf]

Consistent transgene expression at multiple insertion sites in maize and soy  
Supplemental figures and tables

Figure S1. Detection of a partial transgene deletion in a T-DNA 3 event identified as single copy and intact by qPCR. RB, right T-DNA border; LB, left T-DNA border; 6x@, stop codons in all 6 reading frames; p, promoter element, t, terminator element; ∇, LoxP site; X, FRT site. Arrows indicate the direction of transcription. Top: PAT protein concentrations in leaf extracts. Bottom: SbS analysis of ~15 kb T-DNA region in an example complete event and event DR containing a partial deletion at the 5' end.

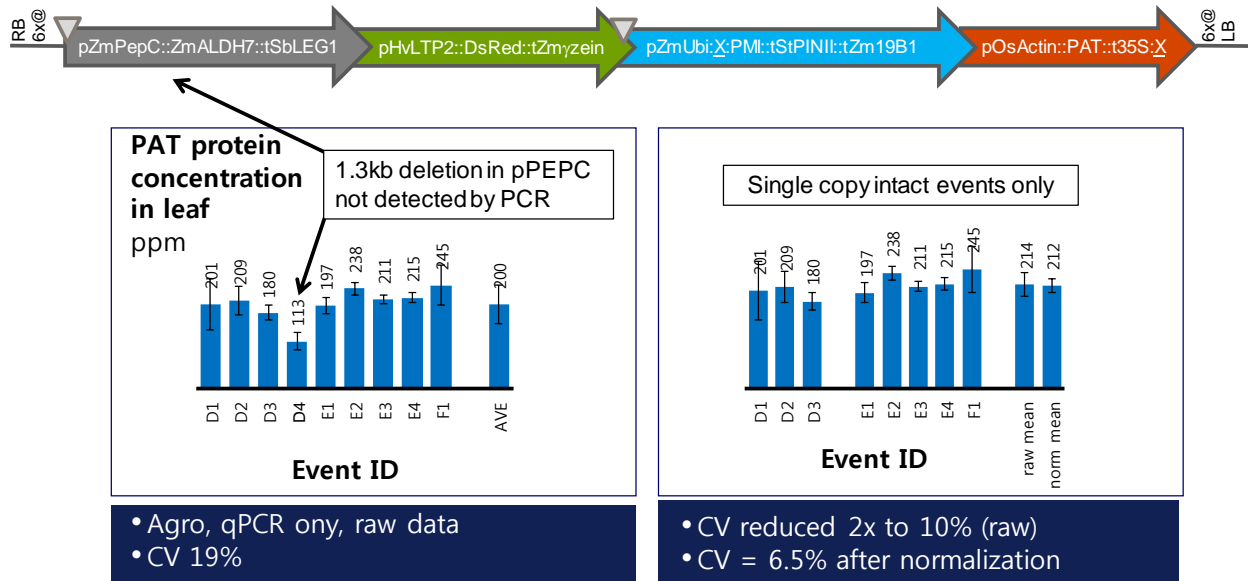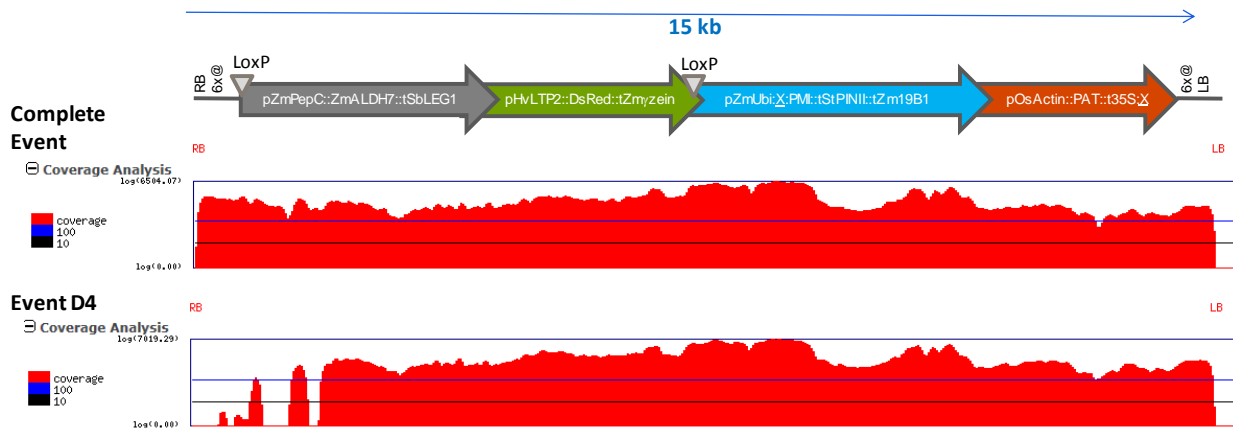

Figure S2. Plasmids used for excision-exchange to generate SSI landing sites in maize.

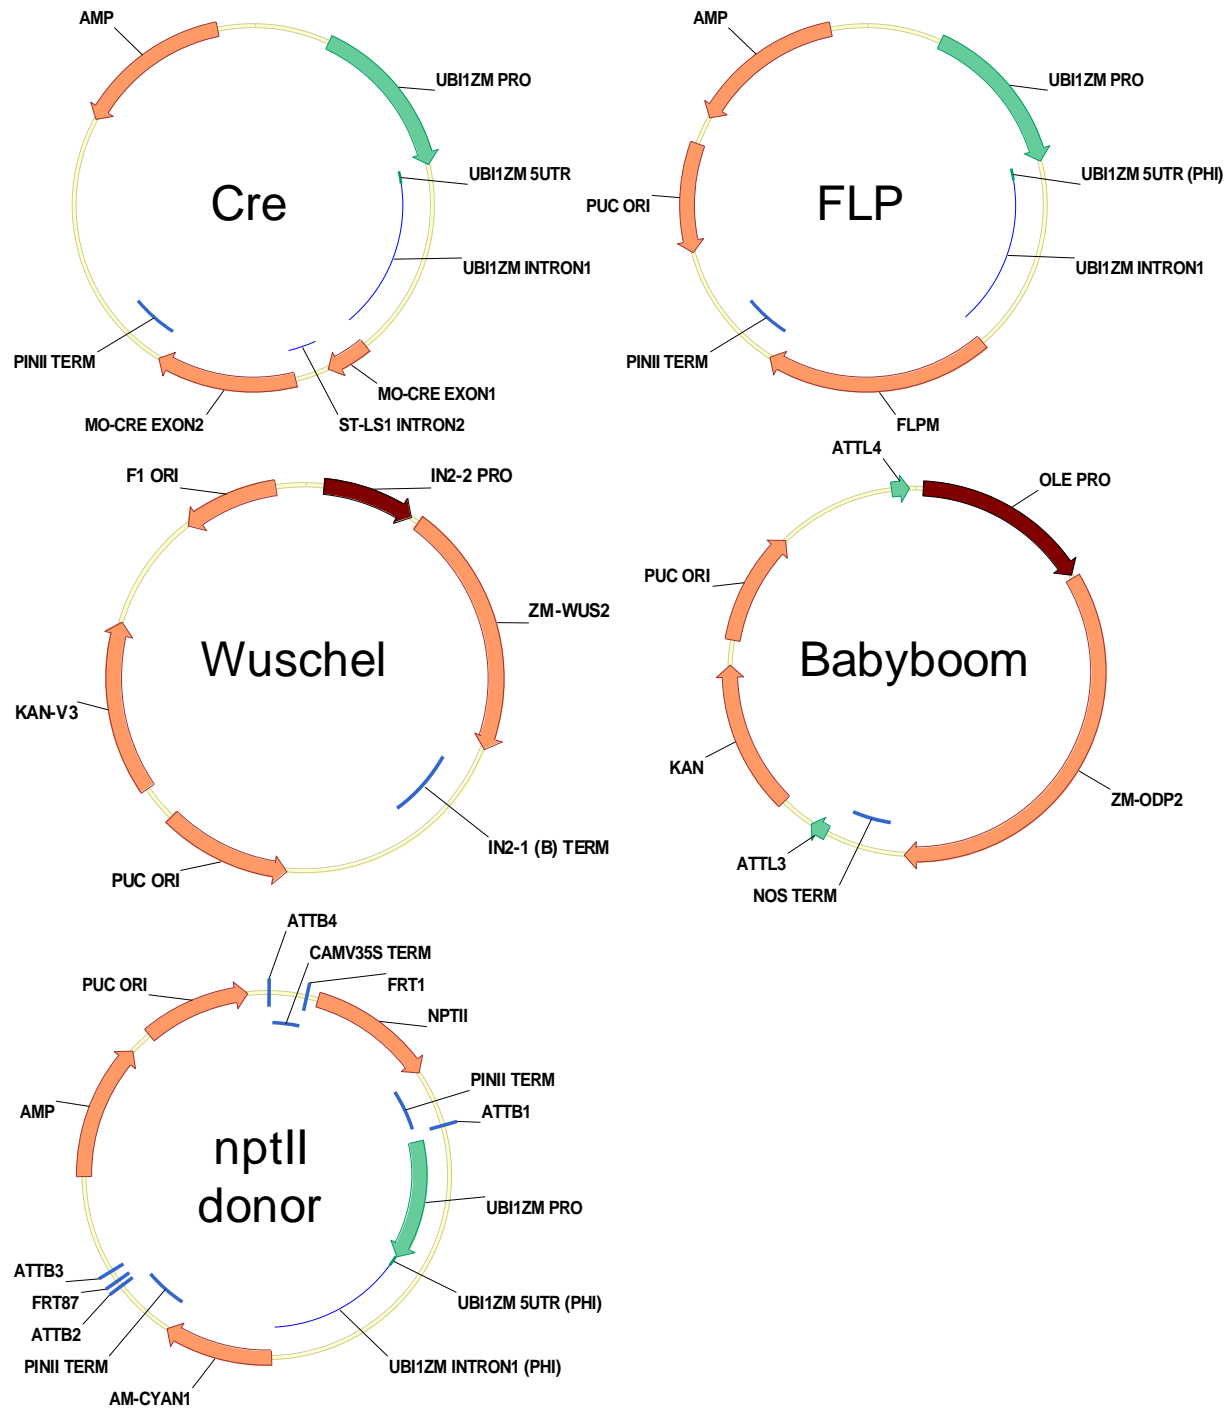

Consistent transgene expression at multiple insertion sites in maize and soy  
Supplemental figures and tables

Figure S3. Structures of SSI landing site intermediates and SSI landing sites in maize and soybean. LoxP, Cre recombinase target site; X, FRT site (FLP Recombinase Target site); RB, right border; LB, left border; 6x@, stop codons in all six reading frames. **A.** Structure of precursor SSI landing site in maize. As described in Methods, transgenic events with the structure shown here were modified by Cre-mediated excision of the LoxP-LoxP fragment containing one or more trait gene(s) followed by FLP-FRT-mediated cassette exchange to replace the fragment X-X and generate the SSI landing site shown in Figure 3A. **B.** SSI landing site in soybean generated by Agro-mediated transformation. **C.** SSI landing site in soybean generated by particle bombardment transformation.

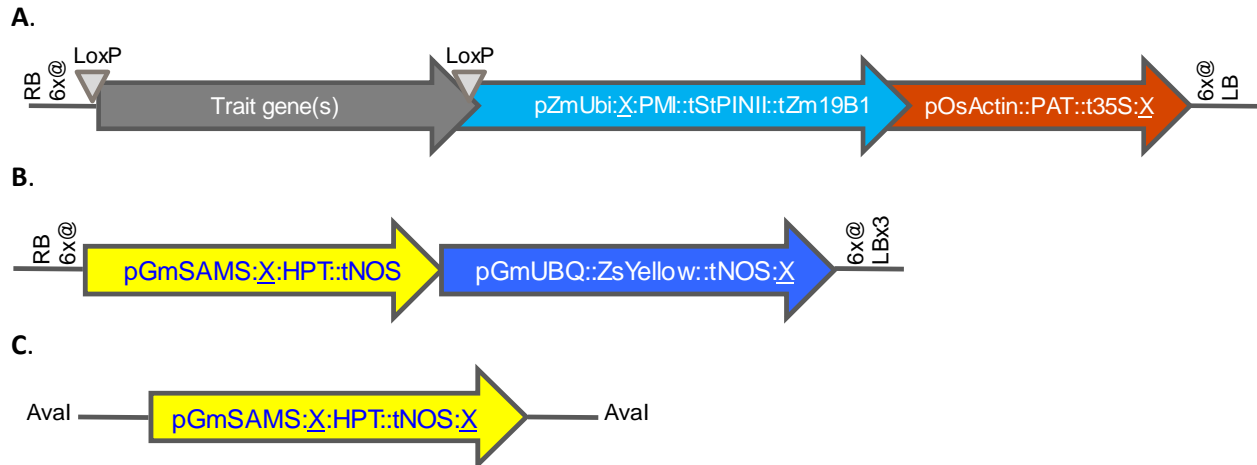

Consistent transgene expression at multiple insertion sites in maize and soy  
Supplemental figures and tables

Table S1. List of DNA regulatory elements and coding sequences present in transgene cassettes.

| Function            | Abbreviation | Name of source gene or gene product                                                                                                                                                                                                                | Source species                             |
|---------------------|--------------|----------------------------------------------------------------------------------------------------------------------------------------------------------------------------------------------------------------------------------------------------|--------------------------------------------|
| Coding Sequences    | ALDH7        | antiquitin-like aldehyde dehydrogenase                                                                                                                                                                                                             | <i>Zea mays</i>                            |
|                     | AM-CYAN      | blue fluorescent protein (gene from Clontech)                                                                                                                                                                                                      | <i>Anemonia majano</i>                     |
|                     | ARGOS8       | auxin regulated gene involved in organ size                                                                                                                                                                                                        | <i>Zea mays</i>                            |
|                     | CTP_IP2-127  | chimeric chloroplast transit peptide from maize and rice genes fused with an engineered variant of the cry2Ab gene                                                                                                                                 | <i>Bacillus thuringiensis</i>              |
|                     | DsRed        | a variant of <i>Discosoma</i> sp. red fluorescent protein (DsRed), from Clontech 'BD Living Colors'                                                                                                                                                | <i>Discosoma</i> species                   |
|                     | GAT          | glyphosate acetyltransferase                                                                                                                                                                                                                       | <i>Bacillus licheniformis</i>              |
|                     | HPT          | hygromycin phosphotransferase                                                                                                                                                                                                                      | <i>Escherichia coli</i>                    |
|                     | IPD032       | Insecticidal Protein Discovery gene number 32                                                                                                                                                                                                      | <i>Alcaligenes faecalis</i>                |
|                     | NPTII        | neomycin phosphotransferase II                                                                                                                                                                                                                     | <i>Escherichia coli</i>                    |
|                     | PAT          | maize-optimized phosphinothricin acetyltransferase                                                                                                                                                                                                 | <i>Spectomyces hygroscopicus</i>           |
|                     | PMI          | phosphomannose isomerase                                                                                                                                                                                                                           | <i>Escherichia coli</i>                    |
|                     | ZsYellow     | yellow fluorescent protein from Clontech                                                                                                                                                                                                           | <i>Streptomyces hygroscopicus</i>          |
| Hairpin transcripts | VRS1-IR      | Transcript produces RNA hairpin comprised of sense and anti-sense versions of a 532-bp 5'-truncated fragment from the maize vulgare six-rowed spike protein separated by a 249 bp sequence containing the 189 bp intron 2 from the potato LS1 gene | <i>Zea mays</i> , <i>Solanum tuberosum</i> |
| 5' regulatory       | pAtUbi       | ubiquitin                                                                                                                                                                                                                                          | <i>Arabidopsis thaliana</i>                |
|                     | pAtUBQ10     | ubiquitin 10                                                                                                                                                                                                                                       | <i>Arabidopsis thaliana</i>                |
|                     | pBSV         | banana streak virus promoter plus intron from maize ortholog of a rice hypothetical protein                                                                                                                                                        | Banana streak virus, <i>Zea mays</i>       |
|                     | pGmSAMS      | S-adenosyl-L-methionine synthetase 5' regulatory region including 5' untranslated region and first intron                                                                                                                                          | <i>Glycine max</i>                         |
|                     | pGmUBQ       | hexameric polyubiquitin 5' regulatory region including 5' untranslated region and first intron (PSO333229)                                                                                                                                         | <i>Glycine max</i>                         |
|                     | pHvLTP2      | lipid transfer protein 2                                                                                                                                                                                                                           | <i>Hordeum vulgare</i>                     |
|                     | pOsActin     | actin 1 promoter plus first intron                                                                                                                                                                                                                 | <i>Oryza sativa</i>                        |
|                     | pSbUbi       | ubiquitin                                                                                                                                                                                                                                          | <i>Sorghum bicolor</i>                     |
|                     | pZmPEPC      | phosphenolpyruvate carboxylase                                                                                                                                                                                                                     | <i>Zea mays</i>                            |
|                     | pZmRCC3      | root cortical cell delineating protein                                                                                                                                                                                                             | <i>Sorghum bicolor</i>                     |
|                     | pZmUbi       | ubiquitin 1 promoter plus 5' untranslated region and first intron                                                                                                                                                                                  | <i>Zea mays</i>                            |
| 3' regulatory       | t35S         | 35S                                                                                                                                                                                                                                                | Cauliflower mosaic virus                   |
|                     | tAtUBQ3      | ubiquitin-3                                                                                                                                                                                                                                        | <i>Arabidopsis thaliana</i>                |
|                     | tAtRPG       | ribosomal protein gene                                                                                                                                                                                                                             | <i>Arabidopsis thaliana</i>                |
|                     | tOsUbi       | ubiquitin                                                                                                                                                                                                                                          | <i>Oryza sativa</i>                        |
|                     | tPvV2        | reserve globulin                                                                                                                                                                                                                                   | <i>Phaseolus vulgaris</i>                  |
|                     | tSbGKAF      | gamma-kafirin storage protein                                                                                                                                                                                                                      | <i>Sorghum bicolor</i>                     |
|                     | tSbLEG1      | legumin 1                                                                                                                                                                                                                                          | <i>Sorghum bicolor</i>                     |
|                     | tStPINII     | proteinase inhibitor II                                                                                                                                                                                                                            | <i>Solanum tuberosum</i>                   |
|                     | tZm19B1      | 19-kD B1 zein                                                                                                                                                                                                                                      | <i>Zea mays</i>                            |
|                     | tZmyzein     | 27 KD gamma zein                                                                                                                                                                                                                                   | <i>Zea mays</i>                            |

*Consistent transgene expression at multiple insertion sites in maize and soy*  
Supplemental figures and tables

Table S2. Maize growth conditions. Day after sowing, day temperature, night temperature, light integral, day length and vapor pressure were recorded from sowing until 21 days post sowing.

| Days after Sowing | Day Temp (° C) | Night temp (° C) | Daily Light Integral ( $\mu\text{mol}\cdot\text{m}^{-2}\cdot\text{d}^{-1}$ ) | Day Length (hrs) | Vapor Pressure Deficit (mbar) |
|-------------------|----------------|------------------|------------------------------------------------------------------------------|------------------|-------------------------------|
| 0-7               | 28.3           | 25.5             | 15                                                                           | 16               | 7                             |
| 8-14              | 25.5           | 22.7             | 20                                                                           | 16               | 8                             |
| 15-21             | 26.1           | 21.1             | 25                                                                           | 16               | 10                            |

*Consistent transgene expression at multiple insertion sites in maize and soy*  
 Supplemental figures and tables

Table S3. Protein specific tryptic peptide sequence information, location of heavy isotope labeled amino acid\*, and MRM transitions.

| Protein   | Peptide Sequence | Q1    | Q3     |
|-----------|------------------|-------|--------|
| ARGOS8    | ALALGQVSVMR      | 572.9 | 776.3  |
| ARGOS8 IS | ALALGQVSV*MR     | 575.9 | 782.3  |
| PAT       | SVVAVIGLPNDPSVR  | 762   | 784.3  |
| PAT IS    | SVVAVIGL*PNDPSVR | 765.5 | 784.3  |
| ALDH7     | IPLVSFTGSTR      | 589.3 | 755.3  |
| ALDH7 IS  | IPLVSFTG*STR     | 590.8 | 758.3  |
| NPTII     | YQDIALATR        | 525.8 | 795.43 |
| NPTII IS  | YQDIAL*ATR       | 529.3 | 766.43 |
| GAT       | HAEIILR          | 434.2 | 730.3  |
| GAT IS    | HAEIIL*R         | 437.7 | 737.3  |
| PMI       | VQNAAGDIVSLR     | 621.8 | 759.4  |
| PMI IS    | VQNAAGDIVSL*R    | 625.3 | 766.4  |
